# Supplementary material
Source: publisher site journal article supplement (https://www.spandidos-publications.com/8437/downloadSupplementary)

Figure S1. Forest plot showing multivariate Cox regression results of IPI\_PPI\_group and other clinical variables in the The Cancer Genome Atlas-colon adenocarcinoma dataset, with overall survival time as the target variable. IPI, immune potential index; PPI, PCD potential index; MSI, microsatellite instability.

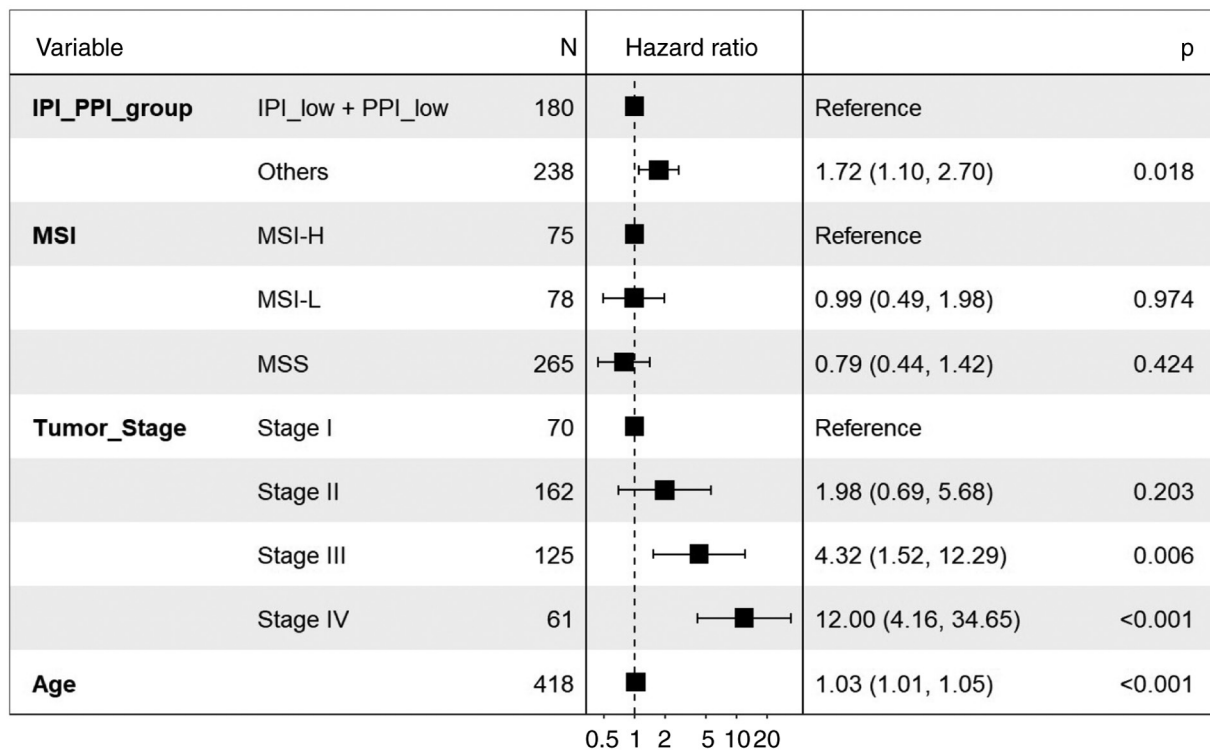

Figure S2. Continued.

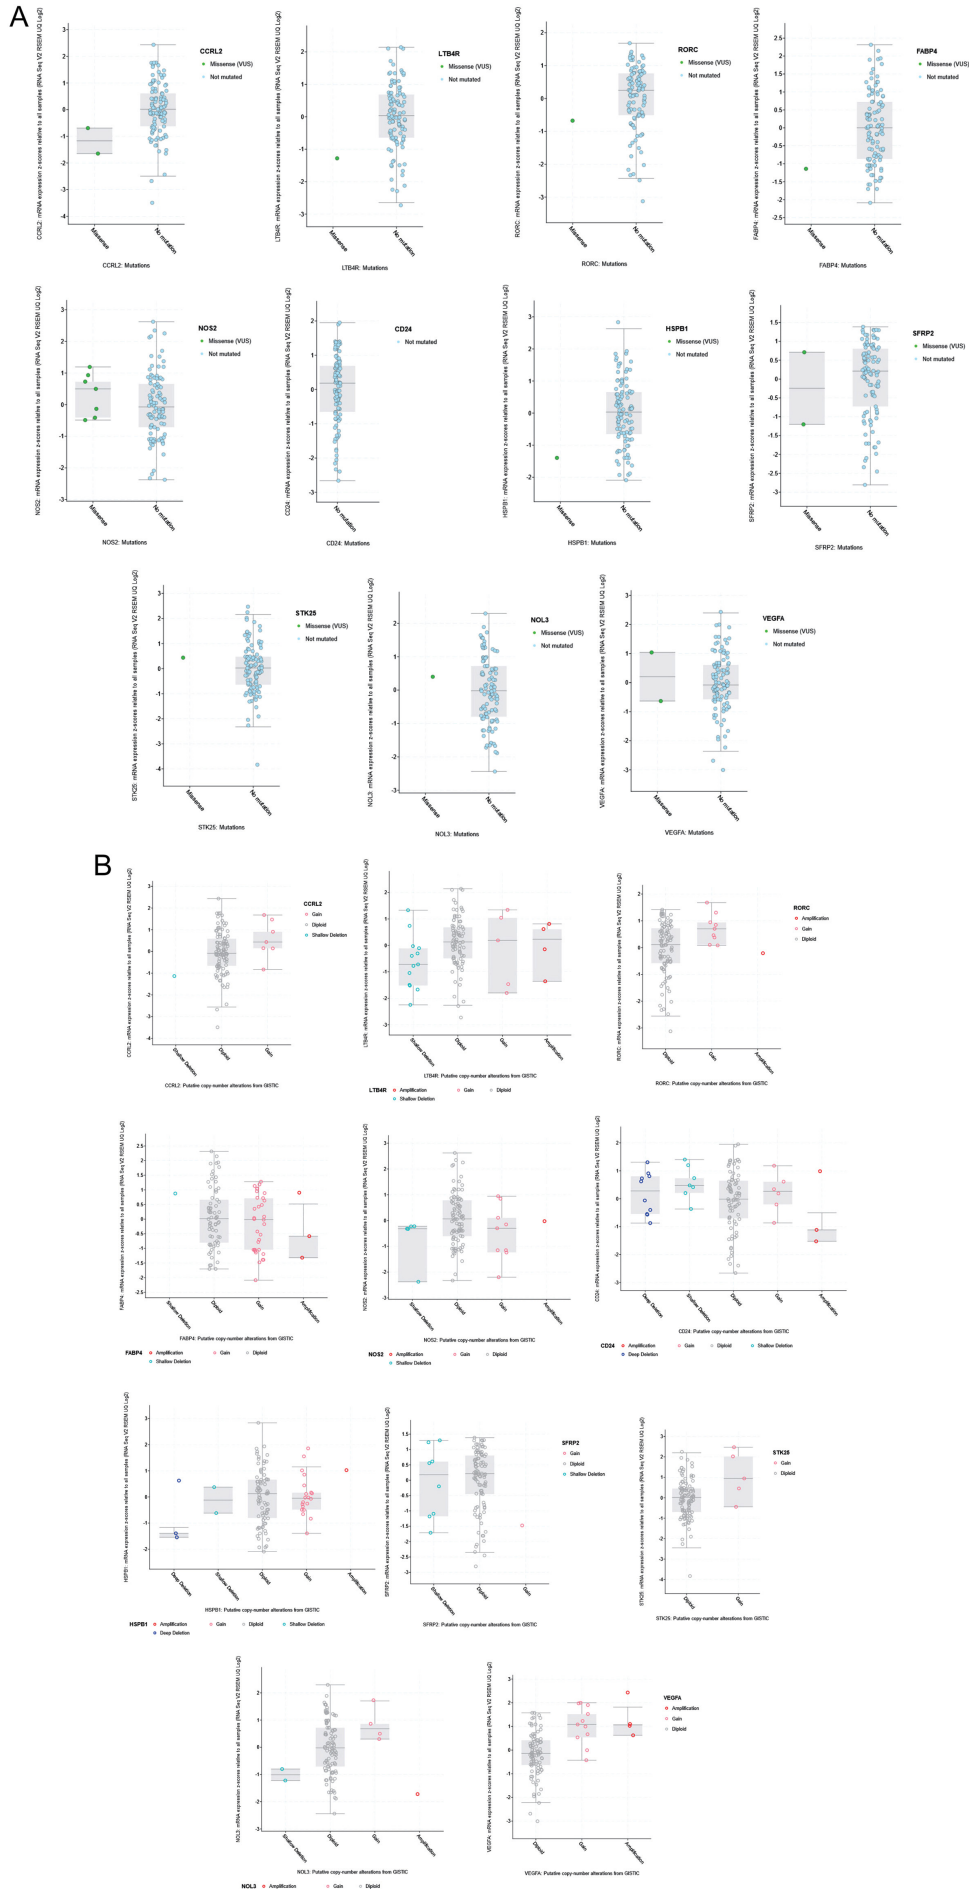

Supplement: Supplementary file 1 [file downloadSupplementary]
